1        A miRNAs Based Exploration of promising Biomarkers in Cervical Can-  
2        cer using Bioinformatic Methods

3

4 Elakkiya Elumalai<sup>1</sup>, A. Malarvizhi<sup>1</sup>, T. Sri Shyla<sup>1</sup>, OM. Aruna devi<sup>1</sup>, Krishna Kant Gupta<sup>1\*</sup>

5

6 1: Centre for Bioinformatics, Pondicherry University, Pondicherry, India, 615014

7 2: School of Chemical and Biotechnology, SASTRA Deemed University, Tamil Nadu, India, 613401

8

9        \*Email ID: krishnakant@scbt.sastra.ac.in; Contact No: +91-6268467956

10

11

12 **Abstract**

13

14 Cervical Cancer (CC) is a gynecologic cancer. In this cancer early detection is incredibly  
15 tough because most of the patients are not have any specific symptoms that results in  
16 suspending the proper identification. In this work, we selected TCGA CESC datasets and  
17 miRNA Seq analysis was done. The expression profiles of miRNAs in cervical cancer  
18 datasets were investigated using bioinformatics tools. The expression profiles of miRNA in  
19 Normal tissue, primary tumor and metastatic samples were analyzed. Based on p-value,  
20 principal component analysis and comparative literature survey, we reported 6 over-  
21 expressed (5X) miRNA at metastatic stage namely, hsa-mir-363, hsa-mir-429, hsa-mir-141,  
22 hsa-mir-93, hsa-mir-203b and hsa-mir-18a. Expression profiles were compared in heatmap.  
23 The target genes for the selected miRNAs were investigated for interaction and pathway  
24 details. The identification of two hub proteins (**PTEN and MYC**) in Protein-Protein  
25 Interaction Network was followed by pathway analysis. Our results indicate that **hsa-mir-**  
26 **363, hsa-mir-429, hsa-mir-141, hsa-mir-93, hsa-mir-203b and hsa-mir-18a** could be a  
27 potential diagnostic biomarkers for early-stage CESC and serve as prognostic predictors  
28 for patients with CESC.

29

30 **Keywords:** Cervical Cancer, Biomarker, miRNA, expression, pathways, protein-protein  
31 interaction

32

33 1

34  
35

36  
37

## 38 **Introduction**

39

40 Cervical Cancer is the highest common cancer that are faced by women all over the world. Early  
41 detection of cervical cancer is very difficult because most of the patients are not having any  
42 specific symptoms. Cervical cancer is the highest common gynecology cancer globally. It is a  
43 malignant tumor in cell of the cervix. Cancer in the cervix of the uterus is called cervical cancer.  
44 Cervix cell changes from normal to pre-cancer and then to cancer stage (Zhao *et al.* 2018)  
45 The primary underlying cause of cervical cancer is due to the infection of Human  
46 Papillomavirus, it is common virus called HPV which is transmitted during sexual  
47 activity. Human Papillomavirus (HPV) 16 and 18 have been found to cause 70% of cervical  
48 cancer causes. Most cases will be diagnosed in women between ages 35 and 44. The significant  
49 causes of cervical cancer is Human papillomavirus (HPV). This may take up to 20 years, or even  
50 longer days to develop cervical cells which are affected by HPV to cancerous tumor. Intake of  
51 vaccination against the most common HPV types associated with cervical cancer are the primary  
52 prevention. DNA testing and VIA (Visual Inspection With Acetic Acid) are alternative  
53 screening tests for cervical cancer prevention (Rath *et al.* 2016). Still, there is no promising  
54 biomarker for cervical cancer.

55 MicroRNAs represent a small non coding RNA which regulate messenger RNA for degradation  
56 and also for intercellular signaling. miRNAs act as a powerful biomarker for predicting  
57 responses and drug targets of cervical cancer (Kilic *et al.* 2015). It is an important role in gene  
58 expression and pathway regulation. miRNAs offers a great potential in medicine and gives  
59 treatment to various disease in future (Kori and Yalcin 2018). miRNAs and target genes can  
60 serve as biomarkers for cervical tumors which are associated with disease progression. Here  
61 miRNAs act as major role as it regulate gene expression as well as regulate biological process  
62 (Gao *et al.* 2018).

63 The miRNAs has a great potential in medicine and biomarker. In this present work, microRNA  
64 (miRNA) based biomarkers for early detection of cervical cancer were investigated. The 100  
65 significantly differentially expressed genes with a 85% variance in PCA1, were identified. The  
66 expression values of these differentially expressed genes were plotted in evolutionary heatmap.  
67 The target proteins of differentially expressed genes were identified, pathway enrichment  
68 analysis and protein-protein interaction was performed. After expression and pathway analysis,  
69 we proposed **hsa-mir-363, hsa-mir-429, hsa-mir-141, hsa-mir-93, hsa-mir-203b and hsa-**  
70 **mir-18a**, a promising biomarkers in cervical cancer.

71

## 72 **Clinical Significance**

73 ● We reported 6 over-expressed (5X) miRNA at metastatic stage as the important principal  
74 components namely, hsa-mir-363, hsa-mir-429, hsa-mir-141, hsa-mir-93, hsa-mir-203b and  
75 hsa-mir-18a.

76 ● The main three pathways enriched for these six miRNAs were; pathways in cancer,  
77 hepatitis B and microRNAs in cancer

78 ● We identified two hub proteins (**PTEN and MYC**) regulated by these ix miRNAs.

79

## 80 **2. Methodology**

81

82

83

### 84 2.1 Cervical Cancer datasets selection

85

86 Subio Platform (Liu *et al.* 2013) was used to select datasets for cervical cancer and its  
87 expression analysis.

88 We took GDC miRNA Seq and we selected project “TCGA CESC (Cervical Squamous Cell  
89 Carcinoma and Endocervical Adenocarcinoma)”. The workflow type was BCGSC miRNA.

90 We collected 311 samples and successfully imported it in GDC miRNA-Seq platform.

91

### 92 2.2 Data categorization and signal processing

93

94 We took median to calculate signals from same sample IDs. We created series and did  
95 normalization of count signals. The normalization includes filtering of signals whose count was  
96 less than 20 and global normalization with 95% percentile. We selected  
97 “cases.samples.sample\_type” and added this column to our data table. It had three categories;  
98 a) Solid tissue normal b) Primary Tumor c) Metastatic. We set solid tissue normal as our control  
99 sample.

100

### 101 2.3 Signal filtering and differential gene expression analysis.

102

103 We filtered signals in the range of -5 to 5. We filtered out those genes whose variance was less.

104 The mi-RNA expression profiles of two samples; Primary Tumor and Metastatic was compared

105 with control. The fold change was set to 5 and student’s T-test was used to compare the sample

106 groups. The P-value was set to less than 0.05. Similarly, “Compare one to all” module was  
107 selected and upregulated-downregulated miRNAs were reported.

108

109 2.4 Heatmap and Principal component analysis.

110

111 The datasets was analyzed for expression profiles of miRNAs in three different groups. The  
112 datasets was chosen to find the principal components (PC) contributing to the cervical cancer.

113 We got majorly two principal components with their cumulative variance. Principal components  
114 Analysis (PCA) is a method for reducing the dimensionality without information loss (Jolliffe  
115 and Cadima. 2016).

116

117

118 2.5 Pathway enrichment analysis

119

120 Metascape server (Karnovsky *et al.* 2012) was used to perform Gene Ontology and KEGG  
121 pathway analysis of DEMs. Metascape is an analysis resource that helps to make sense of one  
122 or more gene lists. It provides automated meta-analysis tools for understanding either common  
123 or unique pathways and protein networks. A pathway has a set of genes related to a specific  
124 biological function and describes the relationship between the genes. This method helps for  
125 identifying biological pathways that are upgrade in a gene list that would be more than expected  
126 by chance .

127

128 .

129

130 2.6 Protein-Protein interaction analysis

131

132 The unique upregulated miRNAs in Normal Vs metastatic and Normal Vs Primary Tumor was  
133 considered and target proteins were selected from mirTarBase (Hsu *et al.* 2011). Protein-Protein  
134 interaction studies was done in STRING database (Szklarczyk *et al.* 2017). This database helps  
135 for analyzing familiar protein-protein interactions . The output was the Protein-Protein  
136 interaction (PPI) Network in the .tsv file format. Pathway enrichment analysis of Normal Vs  
137 metastatic and Normal Vs Primary Tumor was explored in STRING database.

138

139

140

141

142

143

144 **3. Results and Discussion**

145

146

147 3.1 Cervical Cancer Dataset selection, normalization and filtering

148

149 The “TCGA CESC (Cervical Squamous Cell Carcinoma and Endocervical  
150 Adenocarcinoma)” was having 311 samples. The samples were imported and the miRNA Seq  
151 count was normalized (Figure 1). There were 3 “Solid tissue Normal”, 306 “Primary Tumor”  
152 and 2 “Metastatic”. The three groups were separated and colored differently (Figure 2).The  
153 miRNAs whose count was less than 10 was filtered out (Figure 3). Out of 1881 miRNAs, only  
154 382 miRNAs passed this filter (Figure 3).

155

156 3.2 Differential miRNAs expression across all the three groups.

157 The “Solid tissue Normal” was selected as control and compared with “Primary Tumor” and  
158 “Metastatic” (Figure 4). The “Solid tissue Normal” was taken as reference and compared with  
159 “Primary Tumor” and “Metastatic”. At first, 5X upregulation with p-value < 0.05 analysis was  
160 done. There were 29 miRNAs showing upregulation as compared with Primary Tumor.  
161 Similarly, there were 17 miRNAs showing upregulation as compared with metastatic.  
162 Thereafter, 5X downregulation with p-value < 0.05 analysis was done. There were 16 miRNAs  
163 showing downregulation as compared with Primary Tumor. Similarly, there were 15 miRNAs  
164 showing downregulation as compared with metastatic (Figure 5). The names of miRNAs are  
165 given in Table 1.

166 3.3 Unique and common miRNAs in downregulated and upregulated datasets

167 We compared downregulated miRNAs in Primary tumors and metastatic with respect to solid  
168 normal tissue. There were 3 unique miRNAs in Normal Vs metastatic namely hsa-mir-29a, hsa-  
169 mir-1247 and hsa-mir-582. The hsa-mir-29a is shown to inhibits the metastasis and invasion of  
170 cervical cancer (Gong *et al.* 2019). The has-mir-1247 is shown to inhibits cell proliferation by  
171 targeting neuropilins (Shi *et al.* 2014). The involvement of hsa-mir-582 in cervical cancer is  
172 reported by Chen *et al.* 2018.

173

174 There were 4 unique miRNAs in normal vs primary tumor namely hsa-mir-140, hsa-mir-381,  
175 hsa-mir-139, hsa-mir-204. The hsa-mir-140 inhibits the proliferation of human cervical cancer  
176 by targeting RRM2 (Ma *et al.* 2020). The hsa-mir-381 regulates the invasion of human cervical  
177 cancer cells by targeting G Protein Coupled Receptor 34 (GPR 34) (Tan *et al.* 2021). The

178 decreased expression of hsa-mir-139 was found in cervical cancer (Sannigrahi *et al.* 2017). In  
179 lung cancer, the decreased expression of hsa-mir-204 was reported (Liang *et al.* 2020).

180

181 There were 12 common miRNAs in both datasets namely, hsa-mir-10b, hsa-let-7c, hsa-mir-1-  
182 2, hsa-mir-143, hsa-mir-99a, hsa-mir-100, hsa-mir-145, hsa-mir-133a-1, hsa-mir-133a-2, hsa-  
183 mir-1-1, hsa-mir-125b-1 and hsa-mir-125b-2. The downregulation of hsa-mir-10b is reported in  
184 small cell carcinoma of cervix by Huang *et al.*, (Huang *et al.* 2012). In general, people proposed  
185 hsa-let-7c as a promising biomarker in cancer (Chirshv *et al.* 2019). Noone has reported the  
186 association between cervical cancer and hsa-mir-1-2 , hsa-mir-1-1. The hsa-mir-143 act as  
187 cervical cancer suppressor gene (Liu *et al.* 2012). Noone has validated the downregulation of  
188 hsa-mir-99a in cervical cancer. Decreased expression of hsa-mir-100 was found in cervical  
189 cancer (Li *et al.* 2015). The downregulation of hsa-mir-145 have been reported in cervical cancer  
190 (Ma and Li 2019).The hsa-mir-133a targets EGFR and inhibits cervical cancer growth (Song *et*  
191 *al.* 2015). The expression level of hsa-mir-125b was altered in HPV Infection and Cervical  
192 Cancer Development (Ribeiro *et al.* 2015).

193 Similarly, We compared upregulated miRNAs in Primary tumors and metastatic with respect to  
194 solid normal tissue. There were 4 unique miRNAs in Normal Vs metastatic namely hsa-mir-  
195 34c, hsa-mir-93, hsa-mir-106b and hsa-mir-18a. In our study, we found, the overexpression (5X)  
196 of hsa-mir34c in metastatic cervical cancer cell but in contrary Sommerova *et al.*, reported the  
197 underexpression of hsa-mir34c in cervical cancer cells (Sommerová *et al* 2018). The  
198 upregulation of hsa-mir-106b have been reported in cervical cancer (Yi *et al.* 2018). The  
199 suppression of hsa-mir-93 inhibits HPV positive cancer cell progression (Li *et al.* 2019), in our  
200 study it was found to be overexpressed (5X) and helps in cervical cancer progression. It could  
201 be a promising biomarker in cervical cancer. The dual role of hsa-mir-18a in promoting cancer  
202 or inhibiting cancer have been reported (Shen *et al.* 2019) but no one specifically reported its  
203 overexpression and exact role in cervical cancer.

204 There were 16 unique miRNAs in normal vs primary tumor namely hsa-mir-142, hsa-mir-200b,  
205 hsa-mir-944, hsa-mir-16-2, hsa-mir-15b, hsa-mir-425, hsa-mir-16-1, hsa-mir-155, hsa-mir-32, hsa-  
206 mir-200a, hsa-mir-135b, hsa-mir-224, hsa-mir-203b, hsa-mir-196a-2, hsa-mir-1307 and hsa-mir-  
207 200c. The lower expression of hsa-mir-142 was found in cervical cancer tissue (Li *et al.* 2019)  
208 but in our study it was found to be overexpressed (5X). The silencing of hsa-mir-200b reduced  
209 the growth of cervical cancer tissue (Wang and Chen 2019). In our study it was found to be  
210 overexpressed. The hsa-mir-944 has been reported as a biomarker poor prognosis of advanced

211 cervical cancer (Park *et al.* 2019). Noone has reported the specific association between hsa-mir16-  
212 2, hsa-mir16-1 and cervical cancer. The hsa-mir-15b is associated with cervical cancer. The hsa-  
213 mir-425 is upregulated in renal cancer (Quan *et al.* 2018) but no reports are there for its  
214 association with cervical cancer. The overexpression of hsa-mir-155 is associated with increased  
215 risk of cervical cancer in HPV E6/E7 mRNA positive tissues (Park *et al.* 2017). The hsa-mir-32  
216 was reported to be downregulated in cervical cancer but in our study it is upregulated (Liu *et al.*,  
217 2019). The overexpression of hsa-mir-135b has been reported in oral and lung cancer (Lopes *et*  
218 *al.* 2018). The hsa-mir-224 inhibits autophagy and promotes cervical cancer (Fang *et al.* 2016). In  
219 our study, we found the overexpression of hsa-mir-203b. In cervical cancer, miR-196a inhibits  
220 p27kip1, FOXO1 and promotes cell proliferation (Lu *et al.* 2016). The upregulation of hsa-mir-  
221 1307 has been reported in breast and ovarian cancer by targeting SMYD4 protein (Han *et al.*  
222 2019).

223 There were 13 common miRNAs in both datasets namely hsa-mir-183, hsa-mir-203a, hsa-mir-  
224 20b, hsa-mir-31, hsa-mir-182, hsa-mir-96, hsa-mir-141, hsa-mir-130b, hsa-mir-429, hsa-mir-  
225 106a, hsa-mir-210, hsa-mir-363 and hsa-mir-205. The hsa-mir-183 is associated with several  
226 cancer (Cao *et al.* 2020). The hsa-mir-203a is not specifically associated with cervical cancer. In  
227 High Grade Cervical Intraepithelial Neoplasia, the expression of hsa-mir-20b was found to be  
228 high (Szekerczés *et al.* 2020). The hsa-mir-31 was found to be upregulated in cervical cancer  
229 (Wang *et al.* 2017). The hsa-mir-182 plays an onco-miRNA role in cervical cancer (Tang *et al.*  
230 2013). The hsa-mir-96 enhances tumorigenicity of human cervical carcinoma cells through  
231 PTPN9 (Ma *et al.* 2018). The hsa-mir-141 inhibits colorectal cancer by targeting TRAF5 (Liang  
232 *et al.* 2019) but we found in our study, it is overexpressed in cervical cancer. It may be playing  
233 protective role. The hsa-mir-130b targets TNF- $\alpha$  and promotes carcinogenesis of cervical cancer  
234 (Zhang *et al.* 2014). The hsa-mir-429 inhibits CDKN2B and promotes bladder cancer (Yang *et*  
235 *al.* 2017) but its overexpressed status in cervical cancer is unknown. The hsa-mir-210 was  
236 upregulated in cervical cancer. It was proposed to be used as micro RNA signature for cervical  
237 cancer detection (Liu *et al.* 2018). The hsa-mir-363 was found to exhibit protective role in ovarian  
238 cancer as its overexpression decreased growth, colony formation, migration and invasiveness of  
239 SKOV3 cells (Lin *et al.* 2017). Therefore, in cervical cancer also it might be playing protective  
240 role. The serum hsa-mir-205 was reported as novel biomarker for cervical cancer patients (Ma *et*  
241 *al.* 2014).

#### 242 3.4 Heatmap and Principal Component analysis

245 A Heatmap is represented in form of graphical data that uses color coding to represent values.  
246 Heatmap shows the relative intensity of expression values. Variation of colors depends on its  
247 intensity value. Here red indicates over expressed regions, grey represents less expressed  
248 regions and whereas blue denotes normal expressed regions. Average linkage algorithm helps  
249 to group the distance between the weighted values so that two groups have an equal influence  
250 on result part. Pearson correlation method (Zhao *et al.* 2014) is utilized to see the linear  
251 relationship between the two quantitative variables. Finally, heatmap is displayed and also  
252 along with heatmap row dendrogram in form of tree structure is also designed (Figure 6). In  
253 order to identify significant miRNAs, Principal component analysis was done. PC1 contributed  
254 to the variance of 85.52% and PC2 contributed to the cumulative variance of 14.47% (Figure  
255 7). The 100 important miRNAs in PCA1 are shown in Table 2 & Figure 8.

256

### 257 3.5 Gene annotation description analysis

258

259 The 100 miRNAs from PC1 were selected for pathway enrichment analysis and analyzed the  
260 connected biological pathways and Gene Ontological annotations. The enriched term for 100  
261 genes are given in Figure 9. The process enrichment analysis was given in Table 3. The main  
262 enriched terms were microRNAs in cancer, miRNA involved in DNA damage response,  
263 regulation of angiogenesis, regulation of STAT cascade and negative regulation of cell  
264 migration.

### 265 3.6 Target genes collection and pathway analysis.

266 The 14 experimentally validated with strong evidence, target genes for over-expressed miRNAs  
267 in Normal Vs metastatic were collected. The protein-protein interaction of these proteins are  
268 shown in Figure 10. The main three pathways enriched were; pathways in cancer, hepatitis B  
269 and microRNAs in cancer (Table 4). Similarly, 27 target genes for over-expressed miRNAs in  
270 Normal Vs primary tumor were collected. The protein-protein interaction of these proteins are  
271 shown in Figure 11. The main three pathways enriched were; pathways in cancer, proteoglycans  
272 in cancer and microRNAs in cancer (Table 5).

273

## 274 4. Conclusion

275

276 We have used different subio platform to analyze differential miRNA gene expression values  
277 in cervical cancer datasets which was having 311 samples. We normalized the count with  
278 global normalization of 95%. We filtered out those signal whose count was less than 10. We  
279 set t-test, p value < 0.05 and fold change of 5. Finally, we has 381 significant miRNAs. We



280 performed differential gene expression analysis in primary tumor and metastatic with reference to  
281 the normal tissue. There were 29 miRNAs showing upregulation as compared with Primary  
282 Tumor. Similarly, there were 17 miRNAs showing upregulation as compared with metastatic.  
283 Similarly, there were 16 miRNAs showing downregulation as compared with Primary Tumor.  
284 Similarly, there were 15 miRNAs showing downregulation as compared with metastatic. The  
285 main enriched GO terms were microRNAs in cancer, miRNA involved in DNA damage  
286 response. Based on expression, pathway, principal component analysis and literature survey,  
287 this study reported 6 over-expressed (5X) miRNA at metastatic stage namely, hsa-mir-363,  
288 hsa-mir-429, hsa-mir-141, hsa-mir-93, hsa-mir-203b and hsa-mir-18a. It could be used as  
289 appropriate biomarker for the earlier detection of Cervical cancer but its clinical validation is  
290 required.

291

292

293

294

295

## 296 **Acknowledgment**

297

298 We sincerely acknowledge SASTRA Deemed University for providing computational  
299 resources.

300

## 301 **Disclosure statement**

302

303 The authors declare no conflicts of interest.

304

## 305 **Ethics with regard to experiments**

306 No animals or living organisms were used in this study.

307

## 308 **Data Availability Statement**

309 Data will be made available upon request to the corresponding author.

310

311

312

313

314

315

316  
317  
318  
319  
320  
321  
322  
323  
324  
325  
326  
327  
328  
329  
330  
331  
332  
333  
334  
335  
336  
337  
338  
339  
340  
341  
342  
343  
344

## 345 **References**

346  
347  
348  
349  
350  
351  
352  
353  
354  
355  
356  
357  
358  
359  
360  
361  
362  
363  
364

Cao, D., et al., 2020. MicroRNA-183 in Cancer Progression. *J Cancer*,11(6),1315-1324.

Chen, Q., et al., 2018. Identification of differentially expressed miRNAs in early-stage cervical cancer with lymph node metastasis across The Cancer Genome Atlas datasets, *Cancer Manag Res*, 10, 6489-6504.

Chirshhev, E., et al., 2019. Let-7 as biomarker, prognostic indicator, and therapy for precision medicine in cancer, *Clin Transl Med*, 8(1),24.

Fang, W., 2016. miR-224-3p inhibits autophagy in cervical cancer cells by targeting FIP200, *Sci Rep*, 6,33229.

Gao, C., et al., 2018. MicroRNA expression in cervical cancer: Novel diagnostic and prognostic biomarkers, *J Cell Biochem*, 119(8),7080-7090.

Gong, Y., et al., 2019. MiR-29a inhibits invasion and metastasis of cervical cancer via modulating methylation of tumor suppressor SOCS1, *Future Oncol*, 15(15),1729-1744.

365

366 Han, S., et al., 2019. miR-1307-3p Stimulates Breast Cancer Development and  
367 Progression by Targeting SMYD4, *J Cancer*, 10(2),441-448.

368

369

370 Hsu, S.D., et al., 2011. miRTarBase: a database curates experimentally validated  
371 microRNA-target interactions, *Nucleic Acids Res*,39(Database issue), D163-9.

372

373 Huang, L., et al., 2012. Downregulation of six microRNAs is associated with advanced  
374 stage, lymph node metastasis and poor prognosis in small cell carcinoma of the  
375 cervix, *PLoS One*, 7(3):e33762.

376

377 Jolliffe, I.T., Cadima, J., 2016. Principal component analysis: a review and recent  
378 developments, *Philos Trans A Math Phys Eng Sci*,374(2065),20150202.

379

380 Karnovsky, A., 2012. Metscape 2 bioinformatics tool for the analysis and visualization  
381 of metabolomics and gene expression data, *Bioinformatics*.,28(3),373-80.

382

383

384 Kilic, S., et al., 2015. The relevance of molecular biomarkers in cervical cancer  
385 patients treated with radiotherapy, *Ann Transl Med*, 3(18),261.

386

387 Kori, M. and Yalcin, Arga, K., 2018. Potential biomarkers and therapeutic targets in  
388 cervical cancer: Insights from the meta-analysis of transcriptomics data within  
389 network biomedicine perspective, *PLoS One*,13(7),e0200717.

390

391 Li, C., et al., 2015. Multiple Roles of MicroRNA-100 in Human Cancer and its  
392 Therapeutic Potential, *Cell Physiol Biochem*, 37(6),2143-59.

393

394 Li, J., et al., 2019. Suppression of miR-93-5p inhibits high-risk HPV-positive cervical  
395 cancer progression via targeting of BTG3, *Hum Cell*, 32(2), 160-171.

396

- 397 Liang, C.Y., et al., 2020. Downregulation of hsa-microRNA-204-5p and identification  
398 of its potential regulatory network in non-small cell lung cancer: RT-qPCR,  
399 bioinformatic- and meta-analyses, *Respir Res*, 21(1),60.  
400
- 401 Liang, Z., et al., 2019. MiR-141-3p inhibits cell proliferation, migration and invasion  
402 by targeting TRAF5 in colorectal cancer, *Biochem Biophys Res Commun*,  
403 514(3),699-705.  
404
- 405 Liu, D., et al., 2013. Bridging the gap between systems biology and synthetic biology,  
406 *Front Microbiol*, 25(4),211.  
407
- 408 Liu, L., et al., 2012. miR-143 is downregulated in cervical cancer and promotes  
409 apoptosis and inhibits tumor formation by targeting Bcl-2, *Mol Med Rep*, 5(3),753-  
410 60.  
411
- 412 Li. M., et al., 2017. Expression of microRNA-142-3p in cervical cancer and its  
413 correlation with prognosis, *Eur Rev Med Pharmacol Sci*, 21(10),2346-2350.  
414
- 415 Lin, Y., et al., 2017. MicroRNA-363 inhibits ovarian cancer progression by inhibiting  
416 NOB1, *Oncotarget*, 8(60),101649-101658.  
417
- 418 Liu, S.S., et al., 2018. Oncogenic microRNA signature for early diagnosis of cervical  
419 intraepithelial neoplasia and cancer, *Mol Oncol*, 12(12), 2009-2022.  
420
- 421 Liu, Y.J., et al., 2019. MiR-32-5p regulates the proliferation and metastasis of cervical  
422 cancer cells by targeting HOXB8, *Eur Rev Med Pharmacol Sci*.  
423
- 424 Lopes, C.B., et al., 2018. Differential expression of hsa-miR-221, hsa-miR-21, hsa-  
425 miR-135b, and hsa-miR-29c suggests a field effect in oral cancer. *BMC Cancer*, 18,  
426 721.  
427
- 428 Lu, Y.C., et al., 2016. miR-196, an Emerging Cancer Biomarker for Digestive Tract  
429 Cancers, *J Cancer*, 7(6),650-5.  
430

431

432 Ma, J., et al., 2020. miR-140-3p impedes the proliferation of human cervical cancer  
433 cells by targeting RRM2 to induce cell-cycle arrest and early apoptosis, *Bioorg*  
434 *Med Chem*, 28(3),115283.

435

436

437 Ma,L., and Li, L.L., 2019. miR-145 Contributes to the Progression of Cervical  
438 Carcinoma by Directly Regulating FSCN1, *Cell Transplant*, 28(9-10),1299-1305.

439

440 Ma, Q., et al., 2014. Serum microRNA-205 as a novel biomarker for cervical cancer  
441 patients, *Cancer Cell Int*, 14,81.

442

443 Ma. X., et al., 2018. MiR-96 enhances cellular proliferation and tumorigenicity of  
444 human cervical carcinoma cells through PTPN9, *Saudi J Biol Sci*, 25(5),863-867.

445

446 Park, S., et al., 2019. microRNA-944 overexpression is a biomarker for poor prognosis  
447 of advanced cervical cancer, *BMC Cancer*, 19(1),419.

448

449 Park, S., et al., 2017. MiR-9, miR-21, and miR-155 as potential biomarkers for HPV  
450 positive and negative cervical cancer, *BMC Cancer*, 17(1),658.

451 Quan, J., et al., 2018. Oncogenic miR-425-5p is associated with cellular migration,  
452 proliferation and apoptosis in renal cell carcinoma, *Oncol Lett*, 16(2),2175-2184.

453

454 Rath, S.N., et al., 2016. In Silico Study of miRNA Based Gene Regulation, Involved  
455 in Solid Cancer, by the Assistance of Argonaute Protein. *Genomics Inform*,  
456 14(3),112-124.

457

458 Ribeiro, J., et al., 2015. miR-34a and miR-125b Expression in HPV Infection and  
459 Cervical Cancer Development, *Biomed Res Int*, 2015,304584.

460

461 Sannigrahi, M.K., et al., 2017. Role of Host miRNA Hsa-miR-139-3p in HPV-16-  
462 Induced Carcinomas, *Clin Cancer Res*, 23(14),3884-3895.

463

464 Shen, K., et al., 2019. The dual functional role of MicroRNA-18a (miR-18a) in cancer  
465 development, *Clin Transl Med*, 8(1),32.

466

467 Shi, S., et al., 2014. miR-1247 is correlated with prognosis of pancreatic cancer and  
468 inhibits cell proliferation by targeting neuropilins. *Curr Mol Med*,14(3),316-27.

469

470 Sommerová, L., et al., 2018. Expression and Functional Characterization of miR-34c  
471 in Cervical Cancer. *Klin Onkol*.

472

473 Song, X., et al., 2015. miR-133a inhibits cervical cancer growth by targeting EGFR.  
474 *Oncol Rep*, 34(3),1573-80.

475

476 Szklarczyk, D., et al., 2017. The STRING database in 2017: quality-controlled protein-  
477 protein association networks, made broadly accessible, *Nucleic Acids Res*,  
478 45(D1),D362-D368.

479

480 Szekerczés, T., et al., 2020. Increased miR-20b Level in High Grade Cervical  
481 Intraepithelial Neoplasia, *Pathol Oncol Res*, 26(4), 2633-2640.

482

483 Tan, Y., et al., 2021. MicroRNA-381 targets G protein-Coupled receptor 34 (GPR34) to  
484 regulate the growth, migration and invasion of human cervical cancer cells.

485 *Environ Toxicol Pharmacol*, 81, 103514.

486 Tang, T., et al., 2013. MicroRNA-182 plays an onco-miRNA role in cervical cancer,  
487 *Gynecol Oncol*, 129(1),199-208.

488

489 Wang, J.Y., and Chen, L.J., 2019. The role of miRNAs in the invasion and metastasis  
490 of cervical cancer, *Biosci Rep*, 39(3),BSR20181377.

491

492 Wang, N., et al., 2017. miR-31 Functions as an Oncomir Which Promotes Epithelial-  
493 Mesenchymal Transition via Regulating BAP1 in Cervical Cancer, *Biomed Res Int*,  
494 2017,6361420.

495

496 Yang, J., et al., 2017. Hsa-miR-429 promotes bladder cancer cell proliferation via  
497 inhibiting CDKN2B, *Oncotarget*, 8(40),68721-68729.

498

499 Yi, Y., et al., 2018. The role of miR-106p-5p in cervical cancer: from expression to  
500 molecular mechanism, *Cell Death Discov*, 4,36.

501

502 Zhang, J., et al., 2014. NF- $\kappa$ B-modulated miR-130a targets TNF- $\alpha$  in cervical cancer  
503 cells. *J Transl Med*, 12,155.

504

505 Zhao, L., et al., 2018. Exploration of the molecular mechanisms of cervical cancer  
506 based on mRNA expression profiles and predicted microRNA interactions. *Oncol*  
507 *Lett.* ,15(6),8965-8972.

508

509 Zhao, S., et al., 2014. Advanced heat map and clustering analysis using heatmap3.  
510 *Biomed Res Int*. 2014,986048.

511

512

513

514

515

516

517

518

519

520

521

522

523

524

525

526

527

528

529

530

531

532

533

534

535

536

537

538

539

540

541

542

543

544

545

546

547

548

549

550

551



GEO accession

GSE81137

Set

microRNA expression profiling in HPV-16/HIV associated Cervical Cancer

▼ Samples

▶ Define groups

Selected 12 out of 12 samples

Columns

Set

| Group   | Accession  | Title                                                            | Source name                                    | Tissue         | Gender | Age      |
|---------|------------|------------------------------------------------------------------|------------------------------------------------|----------------|--------|----------|
| Disease | GSM2143420 | HPV 16 Negative and HIV positive cases Sample1                   | Human cervical smear collected with cyto brush | Cervical cells | female | 37 years |
| Disease | GSM2143421 | HPV 16 Negative and HIV positive cases Sample2                   | Human cervical smear collected with cyto brush | Cervical cells | female | 24 years |
| Disease | GSM2143422 | HPV 16 Negative and HIV positive cases Sample3                   | Human cervical smear collected with cyto brush | Cervical cells | female | 35 years |
| Disease | GSM2143423 | HPV 16 positive and HIV positive cases Sample1                   | Human cervical smear collected with cyto brush | Cervical cells | female | 38 years |
| Disease | GSM2143424 | HPV 16 positive and HIV positive cases Sample2                   | Human cervical smear collected with cyto brush | Cervical cells | female | 30 years |
| Disease | GSM2143425 | HPV 16 positive and HIV positive cases Sample3                   | Human cervical smear collected with cyto brush | Cervical cells | female | 34 years |
| Disease | GSM2143426 | HPV 16 positive and HIV negative cases Sample1                   | Human cervical smear collected with cyto brush | Cervical cells | female | 60 years |
| Disease | GSM2143427 | HPV 16 positive and HIV negative cases Sample2                   | Human cervical smear collected with cyto brush | Cervical cells | female | 40 years |
| Disease | GSM2143428 | HPV 16 positive and HIV negative cases Sample3                   | Human cervical smear collected with cyto brush | Cervical cells | female | 45 years |
| Control | GSM2143429 | Healthy Population Control sample 1 (HIV and HPV Negative cases) | Human cervical smear collected with cyto brush | Cervical cells | female | 40 years |
| Control | GSM2143430 | Healthy Population Control sample 2 (HIV and HPV Negative cases) | Human cervical smear collected with cyto brush | Cervical cells | female | 36 years |
| Control | GSM2143431 | Healthy Population Control sample 3 (HIV and HPV Negative cases) | Human cervical smear collected with cyto brush | Cervical cells | female | 34 years |

|                                    |           |           |           |           |           |           |           |           |           |           |           |           |
|------------------------------------|-----------|-----------|-----------|-----------|-----------|-----------|-----------|-----------|-----------|-----------|-----------|-----------|
| has-mir-152                        | 2.7166810 | 0.9150314 | 1.2766130 | 7.0653860 | 5.7420730 | 4.9651210 | 6.5186120 | 7.7949690 | 5.3166760 | 5.6912010 | 5.1166640 | 6.7305230 |
| hsa-mir-708                        | 1.6711470 | 1.2376380 | 1.8102520 | 6.2400360 | 5.7039220 | 4.5697430 | 6.6039850 | 6.7371690 | 5.7262950 | 4.8077890 | 4.1053940 | 1.7167760 |
| hsa-mir-21                         | 1.9544450 | 0.8964875 | 1.0454900 | 4.5114700 | 3.8724570 | 3.4993210 | 5.2116650 | 4.5995040 | 5.2421560 | 3.4828000 | 2.0083700 | 2.0565550 |
| hsa-mir-200a                       | 1.0112920 | 0.8073068 | 1.7234720 | 6.0210200 | 5.0661600 | 3.4329510 | 5.0587010 | 6.4224720 | 4.7661110 | 3.6264270 | 1.6178760 | 2.2382530 |
| hsa-mir-339                        | 2.3260950 | 1.5974590 | 1.6962390 | 5.3567390 | 3.9151860 | 5.7631940 | 4.1343590 | 5.4637420 | 4.4222720 | 5.6249870 | 2.4592630 | 2.7340290 |
| hsa-mir-502                        | 1.1673930 | 1.3040450 | 3.1721080 | 6.2287850 | 6.0687820 | 6.3057430 | 4.9643790 | 5.9115770 | 5.8455670 | 5.9167270 | 1.8133140 | 5.8497620 |
| hsa-mir-151                        | 5.1015790 | 1.2099990 | 3.0490380 | 6.7254510 | 6.6896800 | 6.4175370 | 5.6299780 | 7.0492000 | 6.5545700 | 6.5445620 | 5.5542870 | 7.4976230 |
| hsa-mir-4255                       | 1.4024830 | 2.0811900 | 1.0887910 | 0.4041302 | 1.1367200 | 0.7487477 | 0.5696853 | 0.6245691 | 0.6550105 | 0.5276791 | 0.8006036 | 0.8006036 |
| hsa-mir-151                        | 6.3262850 | 1.1345010 | 3.6196770 | 9.0248780 | 8.0074900 | 8.1349770 | 7.7887600 | 9.2942410 | 7.8929960 | 7.9800710 | 5.8438330 | 7.8685870 |
| hsa-mir-138-1 // hsa-mir-138-2     | 0.8433079 | 0.4954664 | 0.7397966 | 5.3186210 | 2.9573220 | 3.1854690 | 1.9758930 | 5.4301970 | 3.6957770 | 2.8029460 | 0.9671526 | 0.9820466 |
| hsa-mir-151b                       | 4.5545520 | 1.1438630 | 2.2702270 | 5.3429560 | 4.9648440 | 5.7030150 | 4.6512090 | 6.4419620 | 5.0912490 | 5.5877220 | 3.8089350 | 6.1904060 |
| hsa-mir-3978                       | 1.2937230 | 1.2886280 | 1.2124520 | 0.6827532 | 0.9231813 | 0.9183030 | 0.7609681 | 0.7427365 | 0.7482306 | 0.9126512 | 0.8065875 | 0.9956127 |
| hsa-mir-452                        | 3.1398820 | 1.2643040 | 2.1953230 | 5.0676840 | 5.4108600 | 4.2707700 | 6.2706180 | 7.7688250 | 5.9053780 | 2.6800110 | 2.8742900 | 7.2950470 |
| hsa-mir-130a                       | 4.9958120 | 1.9116880 | 2.8928830 | 6.3174410 | 6.3614070 | 6.7121030 | 6.4035500 | 7.7356970 | 6.9005490 | 6.5576710 | 3.2663270 | 8.9150530 |
| hsa-mir-3659                       | 1.4536440 | 2.2516870 | 1.5307310 | 0.6769360 | 1.1713700 | 0.9132471 | 1.0164800 | 1.1202530 | 1.2282230 | 0.8045772 | 0.8517649 | 1.2376380 |
| hsa-mir-135b                       | 0.5577430 | 0.2746917 | 0.6093709 | 0.9048522 | 0.7196547 | 1.0678430 | 0.7501452 | 0.6615151 | 0.7621026 | 0.9526331 | 0.8975596 | 1.3864860 |
| hsa-mir-4658                       | 1.5139510 | 2.0736420 | 1.4564540 | 0.7472516 | 0.7212973 | 1.2603540 | 0.8957552 | 1.0293320 | 0.9102423 | 0.8376777 | 1.0895250 | 1.3925620 |
| hsa-mir-500a                       | 1.5591850 | 0.9555225 | 1.9828400 | 5.7931440 | 5.5401390 | 5.5619420 | 4.2757250 | 5.1626110 | 5.1626110 | 4.6576730 | 1.1036170 | 2.7868340 |
| hsa-mir-183                        | 1.1252260 | 0.8852178 | 0.8689884 | 4.9339170 | 1.9949230 | 4.0871540 | 2.7015070 | 5.2631410 | 3.8926290 | 3.3672700 | 1.2284500 | 1.0376610 |
| hsa-mir-34a                        | 4.9992330 | 1.2376380 | 4.5394620 | 8.2364210 | 7.8753510 | 6.9701840 | 8.2397840 | 8.6016590 | 7.8493490 | 5.5993370 | 4.2747970 | 6.8519220 |
| hsa-mir-1255b-1 // hsa-mir-1255b-2 | 1.8434430 | 2.8936400 | 1.1684790 | 1.1636530 | 0.8379232 | 1.1060780 | 1.0383860 | 1.3182440 | 1.1088760 | 0.5725790 | 0.7688085 | 0.7809604 |
| hsa-mir-4642                       | 1.5591850 | 2.8117550 | 2.9296100 | 0.8656690 | 0.8065874 | 1.0977790 | 0.7515791 | 0.7667492 | 1.4255860 | 1.3654410 | 2.3178860 | 1.1049310 |
| hsa-mir-500a                       | 2.7746230 | 1.3548540 | 2.5566120 | 6.1705270 | 5.0867520 | 6.0667690 | 5.0147180 | 5.9723590 | 5.8647490 | 5.0083240 | 1.6464150 | 5.9873910 |

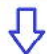

miRNA

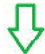

Control Values

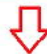

Disease Values

# Heatmap

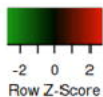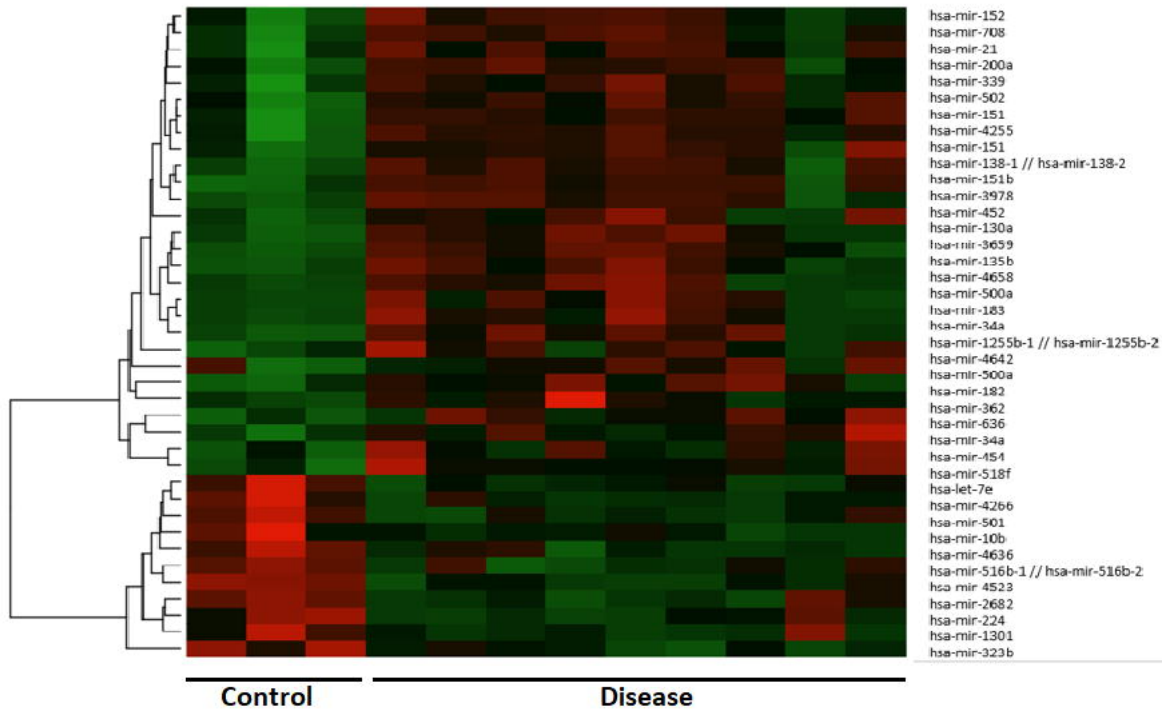

|    | A         | B         | C         | D         | E         | F         | G         | H         | I         | J         | K         | L         | M            |                                                                                                                   |
|----|-----------|-----------|-----------|-----------|-----------|-----------|-----------|-----------|-----------|-----------|-----------|-----------|--------------|-------------------------------------------------------------------------------------------------------------------|
| 1  | hsa-mir-1 | hsa-mir-2 | hsa-mir-3 | hsa-mir-1 | hsa-mir-1 | hsa-mir-4 | hsa-mir-5 | hsa-mir-2 | hsa-mir-5 | hsa-mir-3 | hsa-mir-3 | hsa-mir-1 | hsa-mir-4658 | miRNA                                                                                                             |
| 2  | 2.716681  | 1.954445  | 2.326095  | 5.101579  | 0.843308  | 0.726486  | 0.915613  | 0.536507  | 1.237638  | 1.293723  | 1.453644  | 0.557743  | 1.513951     | Control 1                                                                                                         |
| 3  | 7.065386  | 4.51147   | 5.356739  | 6.725451  | 5.318621  | 0.539674  | 0.53425   | 1.087918  | 0.806588  | 0.682753  | 0.676936  | 0.904852  | 0.747252     | Disease 1<br>Disease 2<br>Disease 3<br>Disease 4<br>Disease 5<br>Disease 6<br>Disease 7<br>Disease 8<br>Disease 9 |
| 4  | 5.742073  | 3.872457  | 3.915186  | 6.68968   | 2.957322  | 0.682753  | 0.867425  | 0.747995  | 0.930422  | 0.923181  | 1.17137   | 0.719655  | 0.721297     |                                                                                                                   |
| 5  | 4.965121  | 3.499321  | 5.763194  | 6.417537  | 3.185469  | 0.709658  | 0.394588  | 0.747995  | 0.843582  | 0.918303  | 0.913247  | 1.067843  | 1.260354     |                                                                                                                   |
| 6  | 6.518612  | 5.211665  | 4.134359  | 5.629978  | 1.975893  | 0.394529  | 0.467125  | 0.721464  | 0.806588  | 0.760968  | 1.01648   | 0.750145  | 0.895755     |                                                                                                                   |
| 7  | 7.794969  | 4.599504  | 5.463742  | 7.0492    | 5.430197  | 0.580989  | 0.575565  | 0.721464  | 0.6329    | 0.742737  | 1.120253  | 0.661515  | 1.029332     |                                                                                                                   |
| 8  | 5.316676  | 5.242156  | 4.422272  | 6.55457   | 3.695777  | 0.50661   | 0.573316  | 0.740866  | 0.583902  | 0.748231  | 1.228223  | 0.762103  | 0.910242     |                                                                                                                   |
| 9  | 5.691201  | 3.4828    | 5.624987  | 6.544562  | 2.802946  | 0.509913  | 0.743591  | 0.775058  | 0.861661  | 0.912651  | 0.804577  | 0.952633  | 0.837678     |                                                                                                                   |
| 10 | 5.116664  | 2.00837   | 2.459263  | 5.554287  | 0.967153  | 0.547906  | 0.583483  | 0.682725  | 0.624917  | 0.806588  | 0.851765  | 0.89756   | 1.089525     |                                                                                                                   |
| 11 | 6.730523  | 2.056555  | 2.734029  | 7.497623  | 0.982047  | 0.502127  | 0.815904  | 0.963552  | 0.759593  | 0.995613  | 1.237638  | 1.386486  | 1.392562     |                                                                                                                   |

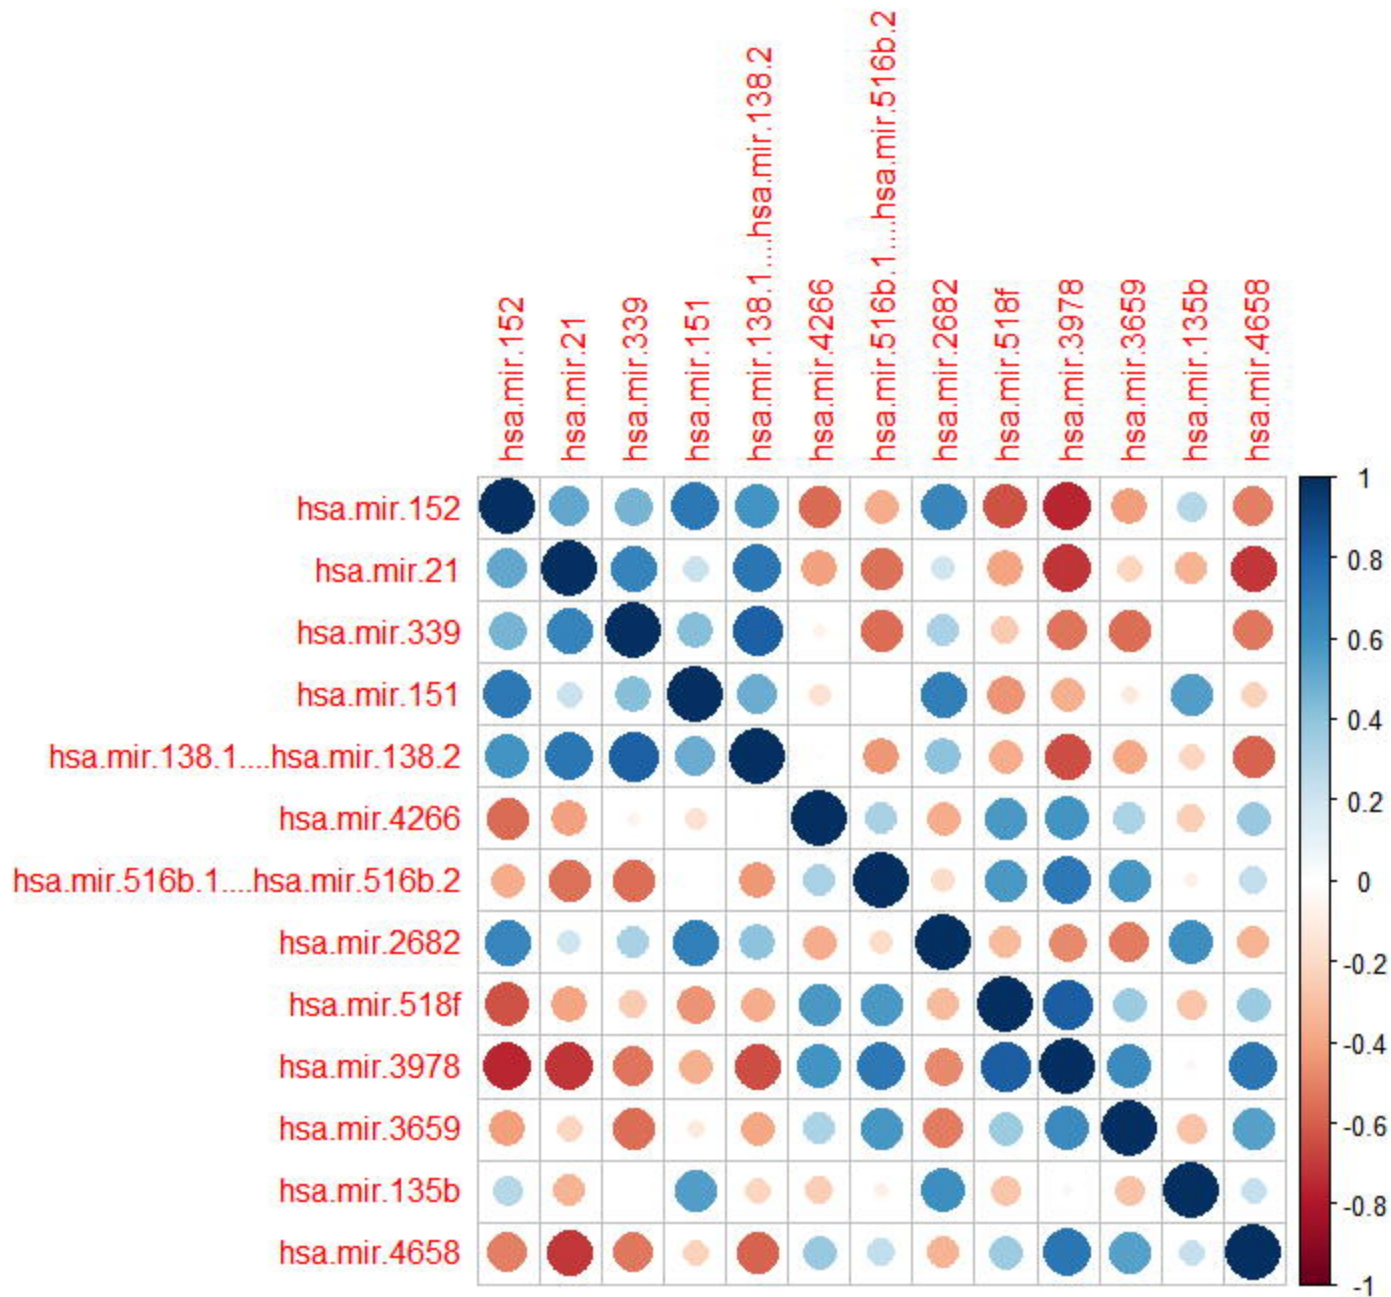

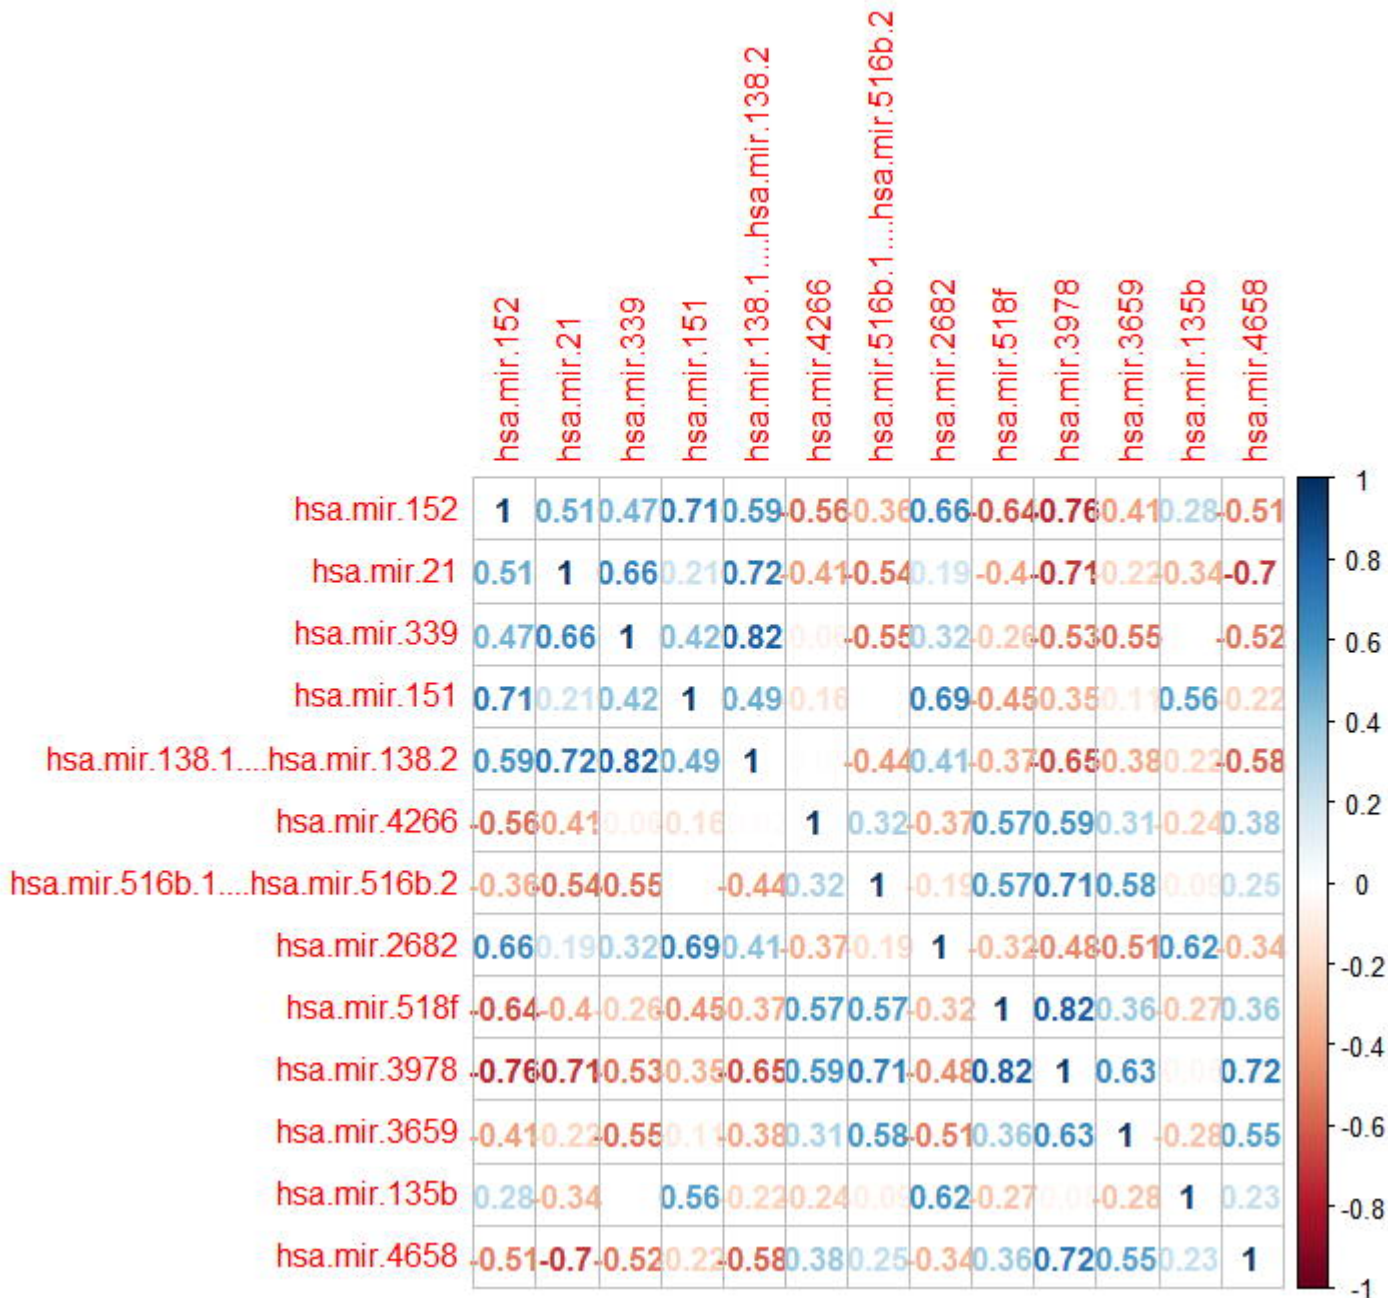

| GO            | Category                | Description                                  | Count | %    | Log10(P) |
|---------------|-------------------------|----------------------------------------------|-------|------|----------|
| GO:0070848    | GO Biological Processes | response to growth factor                    | 60    | 8.16 | -13.67   |
| hsa05200      | KEGG Pathway            | Pathways in cancer                           | 51    | 6.94 | -13.38   |
| hsa05165      | KEGG Pathway            | human papillomavirus infection               | 37    | 5.03 | -12.02   |
| GO:0071417    | GO Biological Processes | cellular response to organonitrogen compound | 50    | 6.8  | -12.02   |
| GO:0030335    | GO Biological Processes | positive regulation of cell migration        | 47    | 6.39 | -11.32   |
| GO:0010942    | GO Biological Processes | positive regulation of cell death            | 54    | 7.35 | -10.57   |
| R-HSA-8953897 | Reactome Gene Sets      | Cellular responses to external stimuli       | 47    | 6.39 | -10.52   |
| R-HSA-194315  | Reactome Gene Sets      | Signaling by Rho GTPases                     | 40    | 5.44 | -10.49   |
| GO:0080135    | GO Biological Processes | regulation of cellular response to stress    | 55    | 7.48 | -10.44   |
| hsa05206      | KEGG Pathway            | MicroRNAs in cancer                          | 32    | 4.35 | -10.38   |

| #node1  | node2  | node1_string_id      | node2_string_id      | coexpression | experimental | database | automated | combined_score |
|---------|--------|----------------------|----------------------|--------------|--------------|----------|-----------|----------------|
| ABCB11  | HAX1   | 9606.ENSP00000263817 | 9606.ENSP00000329002 | 0            | 0.379        | 0        | 0.609     | 0.747          |
| ABCC9   | ABCF2  | 9606.ENSP00000261200 | 9606.ENSP00000222388 | 0.062        | 0            | 0        | 0.507     | 0.518          |
| ABCF2   | RPL10A | 9606.ENSP00000222388 | 9606.ENSP00000363018 | 0.159        | 0.374        | 0        | 0         | 0.451          |
| ABCF2   | GNL1   | 9606.ENSP00000222388 | 9606.ENSP00000365806 | 0.116        | 0.274        | 0        | 0.346     | 0.543          |
| ABHD14B | ECHS1  | 9606.ENSP00000420065 | 9606.ENSP00000357535 | 0.061        | 0.261        | 0        | 0.33      | 0.495          |
| ABLIM1  | PTK2   | 9606.ENSP00000277895 | 9606.ENSP00000341189 | 0            | 0            | 0.9      | 0         | 0.9            |
| ACAP2   | VAMP3  | 9606.ENSP00000324287 | 9606.ENSP00000054666 | 0            | 0.085        | 0        | 0.486     | 0.509          |
| ACAP2   | ARF1   | 9606.ENSP00000324287 | 9606.ENSP00000440005 | 0            | 0.157        | 0        | 0.599     | 0.647          |
| ACTR2   | GPRC5A | 9606.ENSP00000367220 | 9606.ENSP00000014914 | 0            | 0.448        | 0        | 0         | 0.448          |
| ACTR2   | VAMP3  | 9606.ENSP00000367220 | 9606.ENSP00000054666 | 0.153        | 0.078        | 0.9      | 0.129     | 0.922          |
| ACTR2   | WASL   | 9606.ENSP00000367220 | 9606.ENSP00000223023 | 0            | 0.85         | 0.9      | 0.866     | 0.997          |
| ACTR2   | PFN2   | 9606.ENSP00000367220 | 9606.ENSP00000239940 | 0            | 0.267        | 0        | 0.564     | 0.666          |
| ACTR2   | KRAS   | 9606.ENSP00000367220 | 9606.ENSP00000256078 | 0.309        | 0.133        | 0        | 0.094     | 0.41           |
| ACTR2   | RHOC   | 9606.ENSP00000367220 | 9606.ENSP00000285735 | 0.626        | 0.076        | 0        | 0.538     | 0.826          |
| ACTR2   | CALM3  | 9606.ENSP00000367220 | 9606.ENSP00000291295 | 0.127        | 0.185        | 0        | 0.311     | 0.466          |



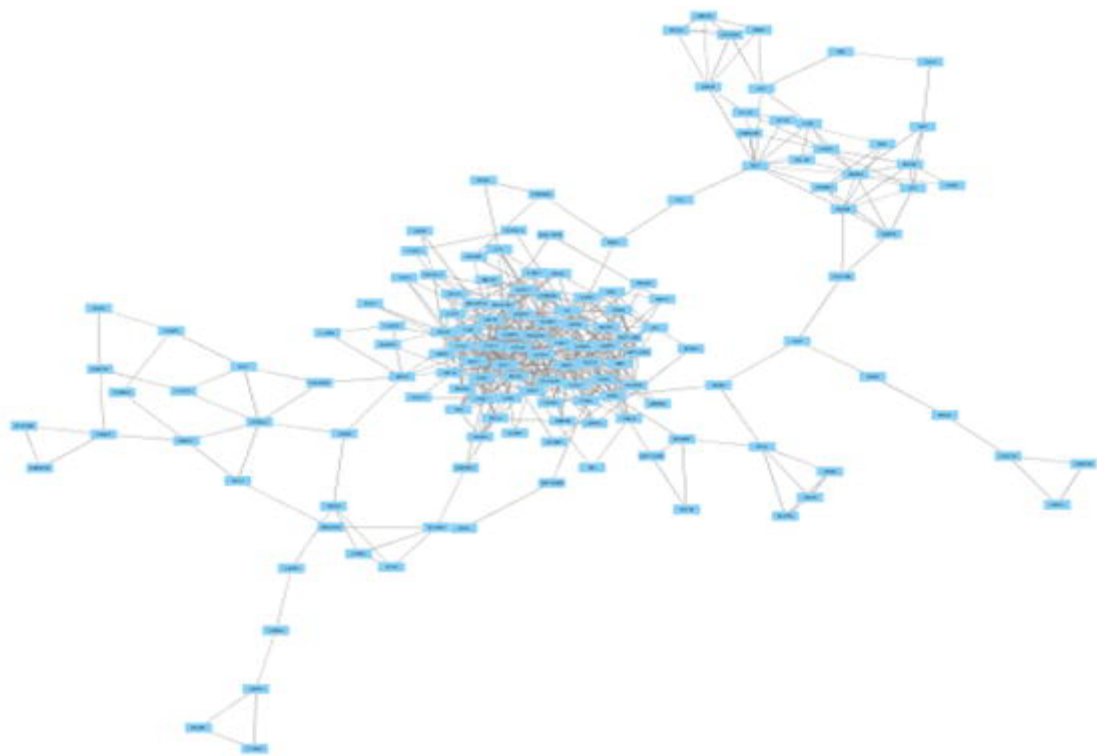

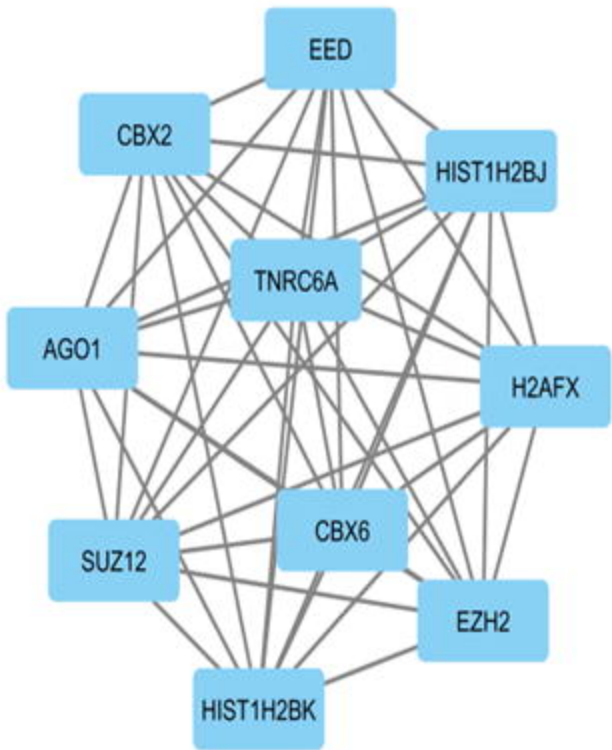

| ID         | Species (miRNA) | Species (Target) | miRNA           | Target  | Validation methods |              |      |                      |     |        |       |   | Sum | # of papers |
|------------|-----------------|------------------|-----------------|---------|--------------------|--------------|------|----------------------|-----|--------|-------|---|-----|-------------|
|            |                 |                  |                 |         | Strong evidence    |              |      | Less strong evidence |     |        |       |   |     |             |
|            |                 |                  |                 |         | Reporter assay     | Western blot | qPCR | Microarray           | NGS | pSILAC | Other |   |     |             |
| MIRT454898 | Homo sapiens    | Homo sapiens     | hsa-miR-151a-3p | SEPT8   |                    |              |      |                      | ✓   |        |       | 1 | 8   |             |
| MIRT004486 | Homo sapiens    | Homo sapiens     | hsa-miR-151a-5p | ARHGDI1 | ✓                  | ✓            | ✓    |                      | ✓   |        | ✓     | 5 | 5   |             |

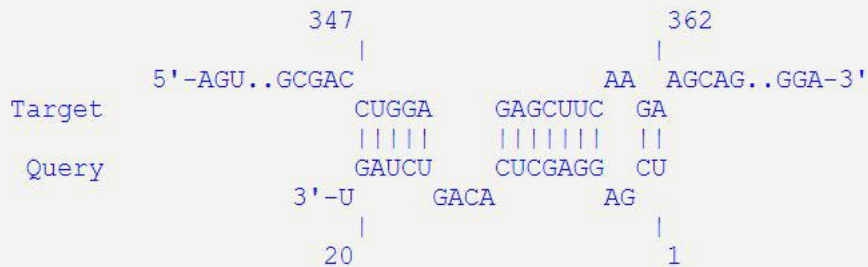

|                           |                       |                        |            |
|---------------------------|-----------------------|------------------------|------------|
| <b>Energy</b>             | <b>-9.86 kcal/mol</b> | Position - Target      | 347 -- 362 |
| Hybridization Energy      | -14.89 kcal/mol       | Position - Query       | 1 -- 20    |
| Unfolding Energy - Target | 3.66 kcal/mol         | Position Seed - Target | 352 -- 358 |
| Unfolding Energy - Query  | 1.37 kcal/mol         | Position Seed - Query  | 5 -- 11    |

Sequence : CUGGAGAGCUUCAAGA&UCGAGGAGCUCACAGUCUAG  
 Structure : (((((((((((((..((&))..)))))))).))))))  
 StartIndex : 347&1

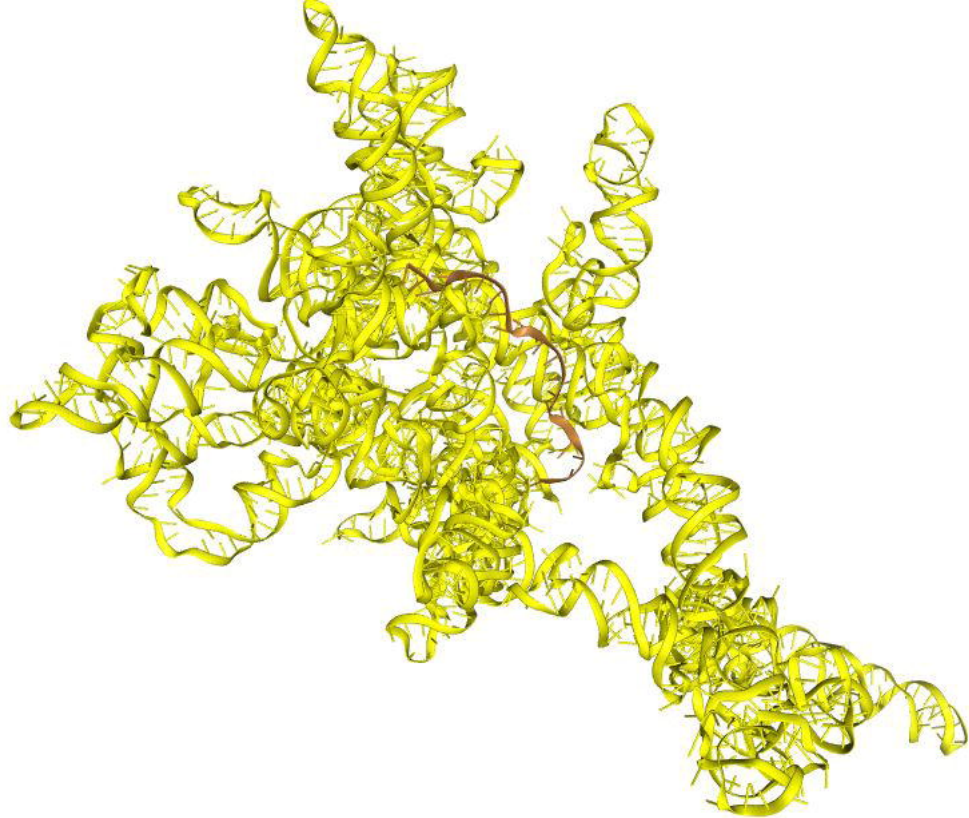

Source: https://www.biorxiv.org/content/10.1101/2021.12.27.474313v1.full.pdf
